# Supplementary material
Source: publisher figshare collection journal article supplement (https://karger.figshare.com/articles/dataset/_/5120719)
Supplement: Supplementary file 1 [file 1]

Supplemental Table 1a. Primers of relevant STS markers, fluorescent dyes used, PCR product sizes and chromosome 9 location. Numbering according to NCBI Map Viewer Build 36.3.

| STS marker      | Primers                                                    | Product size | Chromosome localization |
|-----------------|------------------------------------------------------------|--------------|-------------------------|
| D9S196 PET      | F - GGGATTACACCTCAAAACCA<br>R - ACCACACTGCGGGACTT          | 254-260      | 95513904-<br>95514161   |
| RH109 FAM       | F - CTGACCTGCTGTGCACCTTA<br>R - TTTGGTTAGGGAGTGCCAAG       | 100          | 96405318-<br>96405417   |
| GDB583921 PET   | F - CTGATGGGTGGATGGGTTTTC<br>R - GCAGTCACCCCTCCTCCAGA      | 169          | 96418913-<br>96419089   |
| SHGC-110746 NED | F - ATGAGGGTGCAAATCAAAGAGAG<br>R - GCTGAAATGGCATAGACCCAATA | 156          | 97033833-<br>97033988   |
| U57800 VIC      | F - TTCAATTGTCTGTTTCTCCC<br>R - GGGTCAATCCATCAGGAAGA       | 102          | 97082319-<br>97082420   |
| 203WH8 FAM      | F - AGACAGTTTGAGGCTGCG<br>R - AATTTTGCCAGGAGACTTG          | 189          | 97113690-<br>97113872   |
| SHGC-8725 PET   | F - CGCATAGCGTGTTTGAAAGTT<br>R - GTATTTGTGCATTGGGCTCC      | 229          | 97247982-<br>97248210   |
| SHGC-156297 VIC | F - TTTTCTCGTTATGCTTTGGTGGT<br>R - TGTGAGGCCGAAAAAGTACAAAT | 334          | 97295823-<br>97296156   |
| RH92918 NED     | F - GGCAGAGGCGTTTTTATTTG<br>R - AAGGGGTGTACAAATGAACCC      | 146          | 97312189-<br>97312334   |
| SHGC-149159 NED | F - GAGCACAGCACATTCTGTTTCC<br>R - TGAAGGAATTTGTGTGGAATGTG  | 300          | 97389774-<br>97390073   |
| D9S287 NED      | F - AGGATGCTCCTCACGC<br>R - ACCACTACATTGTTCAAGGG           | 168-180      | 97505937-<br>97506112   |
| G67556 NED      | F - CAAAGGGATGAACCTTTGGA<br>R - AGTGTTGGGGTGGATGTCTC       | 246          | 98100444-<br>98100689   |
| AFMA086YF1 VIC  | F - GGAGAGTTGCTTGACCTCAG                                   | 219          | 98242351-               |

|                 |                                                                |         |                         |
|-----------------|----------------------------------------------------------------|---------|-------------------------|
|                 | R - TTAAGAAGTGAACACCAATAGGC                                    |         | 98242569                |
| D9S180 VIC      | F - CAGTGGTTTGGGAATCGAACC<br>R - AGCTATTTTTGGGGGCTGAG          | 220-230 | 99689308-<br>99689527   |
| SHGC-4650 FAM   | F - CCCTGAGCAAGATACTTAATCTCC<br>R - CCTACCTGTTGGTTATATAGATTTTC | 173     | 100541587-<br>100541759 |
| SHGC-144486 VIC | F - AAATGTGCAGCCACAAGAAAAAT<br>R - ATGCACAGTCTGGAACCCATAGT     | 315     | 100641193-<br>100641507 |
| RH123392 NED    | F - GCTTGACAAAGGCTCACCTAAGA<br>R - CAACTTCCTCAGCAACGCTATTT     | 280     | 101540994-<br>101541273 |
| SHGC-83931 NED  | F - TTCTTCTCAGCCAAGAATGAACC<br>R - AAAATTGAAGCTTGCAGTTGACC     | 315     | 101607994-<br>101608308 |
| D9S127 FAM      | F - AGATTGATTGATACAAGGATTG<br>R - CCCTCAAAATTGCTGTCTAT         | 149     | 105595935-<br>105596091 |

Supplemental Table 1b. Primers for additional markers used for fine mapping of deletion ends, fluorescent dyes used, PCR product sizes and chromosome 9 location. Numbering according to NCBI Map Viewer Build 36.3.

| Marker                       | Primers                                                 | Product size | Chromosome localization |
|------------------------------|---------------------------------------------------------|--------------|-------------------------|
| <i>FANCC</i> – exon 3<br>FAM | F - ATGTTATATTCAGGGATACTTG<br>R - TAACAGTGAAGGGTATGTTTG | 346          | 97042613-<br>97042976   |
| <i>FANCC</i> – exon 2<br>FAM | F - CCCATTTAAGGATGAAGT<br>R - CATACATGGACAACAGTATAG     | 466          | 97049363-<br>97049829   |
| <i>FANCC</i> – exon 1<br>FAM | F - AGAGCCTTTTAGAAATGCTTC<br>R - CCTGAAGTCAGAAAATAATTTC | 329          | 97051186-<br>97051514   |
| BCC5-2 VIC                   | F - ATTCTCCCTGAAGGCCAAGT<br>R - ACTCATTCCCCAACTTGCTG    | 228          | 101558357-<br>101558584 |
| BCC5-3 VIC                   | F - AAGGGCAGGAAGGAGGAATA<br>R - GTGGCATATTTTCCCACACC    | 186          | 101566227-<br>101566412 |
| BCC5 NED                     | F - GAAGATGCCAAACCTCCAAA<br>R - GTCAGTGCCTGCAGATTTGA    | 173          | 101574776-<br>101574948 |

Supplemental Table 2. Typing of several polymorphic STS markers in our patient (IIIa) and her nephew (IVa). Markers D9S287 and D9S180 are deleted in the patient, but normal in nephew.

| STS marker | patient (IIIa) | nephew (IVa) |
|------------|----------------|--------------|
| D9S196     | 2, 2           | 1, 2         |
| D9S287     | 1, del         | 1, 1         |
| D9S180     | 1, del         | 1, 6         |
| D9S127     | 1,1            | 1, 2         |

Supplemental Table 3. All known 23 OMIM genes mapped in 4.5 Mb region of chromosome 9 (q22.32-q22.33), which are deleted in our patient, are listed in table. Beside each gene name, description, OMIM number, there are also listed some functional properties of their protein products. Some of their main functional properties may exert dysfunction through phenotype of the patient (like *TGFBRI*, *CTSL2*, *FOXEL*, *XPA*).

| Gene           | Description                                 | OMIM # | Function/dysfunction of gene product                                                                                                                                                         |
|----------------|---------------------------------------------|--------|----------------------------------------------------------------------------------------------------------------------------------------------------------------------------------------------|
| <i>FANCC</i>   | Fanconi anemia,<br>complementation group C  | 227645 | part of a nuclear protein complex together with FANCA, FANCG and FANCF; essential for protection against chromosome breakage [29, 30]                                                        |
| <i>PTCH1</i>   | patched homolog 1<br>(Drosophila)           | 109400 | receptor for hedgehog proteins, part of the hedgehog signaling pathway; mutations associated with Gorlin syndrome, basal cell carcinoma, medulloblastoma, and holoprosencephaly [1, 2, 7, 9] |
| <i>HSD17B3</i> | hydroxysteroid (17-beta)<br>dehydrogenase 3 | 264300 | catalyzes the conversion of androstenedione to testosterone; deficiency can result in male pseudohermaphroditism with gynecomastia [31]                                                      |
| <i>SLC35D2</i> | solute carrier family 35,                   | 609182 | nucleotide sugar transporter,                                                                                                                                                                |

|               |                                                                 |        |                                                                                                                                                                          |
|---------------|-----------------------------------------------------------------|--------|--------------------------------------------------------------------------------------------------------------------------------------------------------------------------|
|               | member D2                                                       |        | translocation of nucleotide sugars from the cytosol into the lumen compartment [32]                                                                                      |
| <i>ZNF367</i> | zinc finger protein 367                                         | 610160 | potential transcriptional activator of erythroid genes [33]                                                                                                              |
| <i>CDC14B</i> | CDC14 cell division cycle 14 homolog B ( <i>S. cerevisiae</i> ) | 603505 | dual-specificity phosphatase, controls spindle assembly and disassembly during mitosis [34, 35]                                                                          |
| <i>CTSL2</i>  | cathepsin L2                                                    | 603308 | lysosomal cysteine proteinase, role in the maintenance of corneal avascularity [36]                                                                                      |
| <i>TDRD7</i>  | tudor domain containing 7                                       | 611258 | scaffold protein, specific function is unknown [37]                                                                                                                      |
| <i>TMOD1</i>  | tropomodulin 1                                                  | 190930 | actin-capping protein, interacts with tropomyosin (TM) at the pointed end of actin filaments [38]                                                                        |
| <i>NCBPI</i>  | nuclear cap binding protein subunit 1, 80kDa                    | 600469 | component of the nuclear cap-binding protein complex (CBC); CBC promotes pre-mRNA splicing, 3'-end processing, RNA nuclear export, and nonsense-mediated mRNA decay [39] |
| <i>XPA</i>    | xeroderma pigmentosum, complementation group A                  | 278700 | zinc finger protein involved in DNA excision repair [40]                                                                                                                 |

|               |                                                         |        |                                                                                                                                                                                                                                         |
|---------------|---------------------------------------------------------|--------|-----------------------------------------------------------------------------------------------------------------------------------------------------------------------------------------------------------------------------------------|
| <i>FOXE1</i>  | forkhead box E1 (thyroid transcription factor 2)        | 241850 | thyroid transcription factor; plays a role in thyroid morphogenesis; mutations associated with congenital hypothyroidism and cleft palate with thyroid dysgenesis [41]                                                                  |
| <i>HEMGN</i>  | hemogen                                                 | 610715 | human hematopoiesis-specific gene; overexpressed in various tissues and tumors such as thyroid tumor, thymus tumor, non-Hodgkin's lymphoma and PBMCs of patients with leukemia [42]                                                     |
| <i>NANS</i>   | N-acetylneuraminic acid synthase (sialic acid synthase) | 605202 | enzyme that functions in the biosynthetic pathways of sialic acids; catalyzes the condensation of PEP (phosphoenolpyruvate) and ManNAc-6P (N-acetylmannosamine 6-phosphate) to yield NeuNAc-9P (N-acetylneuramic 9-phosphate acid) [43] |
| <i>TRIM14</i> | tripartite motif-containing 14                          | 606556 | cell compartment specification [44]                                                                                                                                                                                                     |
| <i>CORO2A</i> | coronin, actin binding protein, 2A                      | 602159 | intracellular signaling [45]                                                                                                                                                                                                            |
| <i>TBC1D2</i> | TBC1 domain family, member 2                            | 609871 | possible role in regulation of cell differentiation and growth [46]                                                                                                                                                                     |
| <i>GABBR2</i> | gamma-aminobutyric acid                                 | 188890 | slow inhibition of neural activity                                                                                                                                                                                                      |

|                |                                                                                                  |        |                                                                                                                                                                                                                                                                                                           |
|----------------|--------------------------------------------------------------------------------------------------|--------|-----------------------------------------------------------------------------------------------------------------------------------------------------------------------------------------------------------------------------------------------------------------------------------------------------------|
|                | (GABA) B receptor, 2                                                                             |        | through interaction with guanine nucleotide-binding (G) proteins that activate potassium channels, inactivate voltage-dependent calcium channels, and modulate adenylyl cyclase activity [47]                                                                                                             |
| <i>GALNT12</i> | UDP-N-acetyl-alpha-D-galactosamine:polypeptide N-acetylgalactosaminyltransferase 12 (GalNAc-T12) | 610290 | catalyzes the transfer of N-acetylgalactosamine (GalNAc) from UDP-GalNAc to a hydroxyl amino acid on a polypeptide acceptor in the initial step of mucin-type O-linked protein glycosylation, specific for digestive organs [48]                                                                          |
| <i>COL15A1</i> | collagen, type XV, alpha 1                                                                       | 120325 | present in most basement membrane zones, closely associated with large collagen fibrils; may be important in spatial and temporal recruitment of modulators in growth, development and pathological processes; lack of this collagen causes skeletal myopathy and cardiovascular defects in mice [49, 50] |
| <i>TGFBRI</i>  | transforming growth factor, beta receptor I (activin A                                           | 190181 | important member of TGF- signaling pathway, necessary for signal                                                                                                                                                                                                                                          |



|               |                                                                                                    |        |                                                                                                                                                                                         |
|---------------|----------------------------------------------------------------------------------------------------|--------|-----------------------------------------------------------------------------------------------------------------------------------------------------------------------------------------|
|               | receptor type II-like kinase,<br>53kDa)                                                            |        | transduction, mutated in carcinomas of<br>the kidney and bladder [51]                                                                                                                   |
| <i>ALG2</i>   | asparagine-linked<br>glycosylation 2 homolog (S.<br>cerevisiae, alpha-1,3-<br>mannosyltransferase) | 607905 | role in glycoprotein biosynthesis,<br>transfers mannosyl residues from GDP-<br>Man to Man1GlcNAc2-PP-dolichol,<br>deficiency causes congenital disorder<br>of glycosylation CDG-Ii [52] |
| <i>SEC61B</i> | Sec61 beta subunit                                                                                 | 609214 | subunit of the heteromeric SEC61<br>complex, which forms the core of the<br>transmembrane channel for the<br>translocation of proteins across the ER<br>membrane [53]                   |

29 Garcia-Higuera I, Kuang Y, Näf D, Wasik J, D'Andrea AD: Fanconi anemia proteins FANCA, FANCC, and FANCG/XRCC9 interact in a functional nuclear complex. *Mol Cell Biol* 1999;19(7):4866-4873.

30 Pace P, Johnson M, Tan WM, Mosedale G, Sng C, Hoatlin M, de Winter J, Joenje H, Gergely F, Patel KJ.: FANCE: the link between Fanconi anaemia complex assembly and activity. *EMBO J* 2002;21(13) 3414-3423.

31 Mains LM, Vakili B, Lacassie Y, Andersson S, Lindqvist A, Rock JA: 17beta-hydroxysteroid dehydrogenase 3 deficiency in a male pseudohermaphrodite. *Fertil Steril* 2008;89(1):228.e13-17.

32 Ishida N, Kuba T, Aoki K, Miyatake S, Kawakita M, Sanai Y: Identification and characterization of human Golgi nucleotide sugar transporter SLC35D2, a novel member of the SLC35 nucleotide sugar transporter family. *Genomics* 2005;85(1):106-116.

33 Asano H, Murate T, Naoe T, Saito H, Stamatoyannopoulos G: Molecular cloning and characterization of ZFF29: a protein containing a unique Cys2His2 zinc-finger motif. *Biochem J* 2004;384(Pt 3):647-653.

34 Rosso L, Marques AC, Weier M, Lambert N, Lambot MA, Vanderhaeghen P, Kaessmann H: Birth and rapid subcellular adaptation of a hominoid-specific CDC14 protein. *PLoS Biol* 2008;6(6):e140.

35 Berdugo E, Nachury MV, Jackson PK, Jallepalli PV: The nucleolar phosphatase Cdc14B is dispensable for chromosome segregation and mitotic exit in human cells. *Cell Cycle* 2008;7(9):1184-1190.

36 Bernard D, Méhul B, Thomas-Collignon A, Simonetti L, Remy V, Bernard MA, Schmidt R: Analysis of proteins with caseinolytic activity in a human stratum corneum

extract revealed a yet unidentified cysteine protease and identified the so-called "stratum corneum thiol protease" as cathepsin 12. *J Invest Dermatol* 2003;120(4):592-600.

37 Skorokhod O, Nemazanyy I, Breus O, Filonenko V, Panasyuk G: Generation and characterization of monoclonal antibodies to TDRD7 protein. *Hybridoma (Larchmt)* 2008;27(3):211-216.

38 Kong KY, Kedes L: Leucine 135 of tropomodulin-1 regulates its association with tropomyosin, its cellular localization, and the integrity of sarcomeres. *J Biol Chem* 2006;281(14):9589-9599.

39 Ishigaki Y, Li X, Serin G, Maquat LE: Evidence for a pioneer round of mRNA translation: mRNAs subject to nonsense-mediated decay in mammalian cells are bound by CBP80 and CBP20. *Cell* 2001;106(5):607-617.

40 Vasquez KM, Christensen J, Li L, Finch RA, Glazer PM: Human XPA and RPA DNA repair proteins participate in specific recognition of triplex-induced helical distortions. *Proc Natl Acad Sci U S A* 2002;99(9):5848-5453.

41 Al Taji E, Biebermann H, Límanová Z, Hníková O, Zikmund J, Dame C, Grüters A, Lebl J, Krude H: Screening for mutations in transcription factors in a Czech cohort of 170 patients with congenital and early-onset hypothyroidism: identification of a novel PAX8 mutation in dominantly inherited early-onset non-autoimmune hypothyroidism. *Eur J Endocrinol* 2007;156(5):521-529.

42 Li CY, Zhan YQ, Xu CW, Xu WX, Wang SY, Lv J, Zhou Y, Yue PB, Chen B, Yang XM: EDAG regulates the proliferation and differentiation of hematopoietic cells and resists cell apoptosis through the activation of nuclear factor-kappa B. *Cell Death Differ* 2004;11(12):1299-1308.

- 43 Hamada T, Ito Y, Abe T, Hayashi F, Güntert P, Inoue M, Kigawa T, Terada T, Shirouzu M, Yoshida M, Tanaka A, Sugano S, Yokoyama S, Hirota H: Solution structure of the antifreeze-like domain of human sialic acid synthase. *Protein Sci* 2006;15(5):1010-1016.
- 44 Reymond A, Meroni G, Fantozzi A, Merla G, Cairo S, Luzi L, Riganelli D, Zanaria E, Messali S, Cainarca S, Guffanti A, Minucci S, Pelicci PG, Ballabio A: The tripartite motif family identifies cell compartments. *EMBO J* 2001;20(9):2140-2151.
- 45 Zaphiropoulos PG, Toftgård R: cDNA cloning of a novel WD repeat protein mapping to the 9q22.3 chromosomal region. *DNA Cell Biol* 1996;15(12):1049-1056.
- 46 Zhou Y, Toth M, Hamman MS, Monahan SJ, Lodge PA, Boynton AL, Salgaller ML: Serological cloning of PARIS-1: a new TBC domain-containing, immunogenic tumor antigen from a prostate cancer cell line. *Biochem Biophys Res Commun* 2002;290(2):830-838.
- 47 Martin SC, Steiger JL, Gravielle MC, Lyons HR, Russek SJ, Farb DH: Differential expression of gamma-aminobutyric acid type B receptor subunit mRNAs in the developing nervous system and receptor coupling to adenylyl cyclase in embryonic neurons. *J Comp Neurol* 2004;473(1):16-29.
- 48 Guo JM, Zhang Y, Cheng L, Iwasaki H, Wang H, Kubota T, Tachibana K, Narimatsu H: Molecular cloning and characterization of a novel member of the UDP-GalNAc:polypeptide N-acetylgalactosaminyltransferase family, pp-GalNAc-T12. *FEBS Lett* 2002;524(1-3):211-218.
- 49 Myers JC, Amenta PS, Dion AS, Sciancalepore JP, Nagaswami C, Weisel JW, Yurchenco PD: The molecular structure of human tissue type XV presents a unique conformation among the collagens. *Biochem J* 2007;404(3):535-544.

50 Eklund L, Piuhola J, Komulainen J, Sormunen R, Ongvarrasopone C, Fässler R, Muona A, Ilves M, Ruskoaho H, Takala TE, Pihlajaniemi T: Lack of type XV collagen causes a skeletal myopathy and cardiovascular defects in mice. *Proc Natl Acad Sci U S A* 2001;98(3):1194-1199.

51 Chen T, Jackson C, Costello B, Singer N, Colligan B, Douglass L, Pemberton J, Deddens J, Graff JR, Carter JH: An intronic variant of the TGFBR1 gene is associated with carcinomas of the kidney and bladder. *Int J Cancer* 2004;112(3):420-425.

52 Thiel C, Schwarz M, Peng J, Grzmil M, Hasilik M, Braulke T, Kohlschütter A, [von Figura K](#), [Lehle L](#), [Körner C](#): A new type of congenital disorders of glycosylation (CDG-II) provides new insights into the early steps of dolichol-linked oligosaccharide biosynthesis. *J Biol Chem* 2003;278(25):22498-2505.

53 Greenfield JJ, High S: The Sec61 complex is located in both the ER and the ER-Golgi intermediate compartment. *J Cell Sci* 1999;112(Pt 10):1477-1486.
