# Supplementary material
Source: publisher figshare collection journal article supplement (https://karger.figshare.com/articles/dataset/_/5120719)

Supplemental Figure 1. Large deletion in our patient confirmed by long range PCR. An 0.8% agarose gel shows the PCR product of approximately 10800 pb.

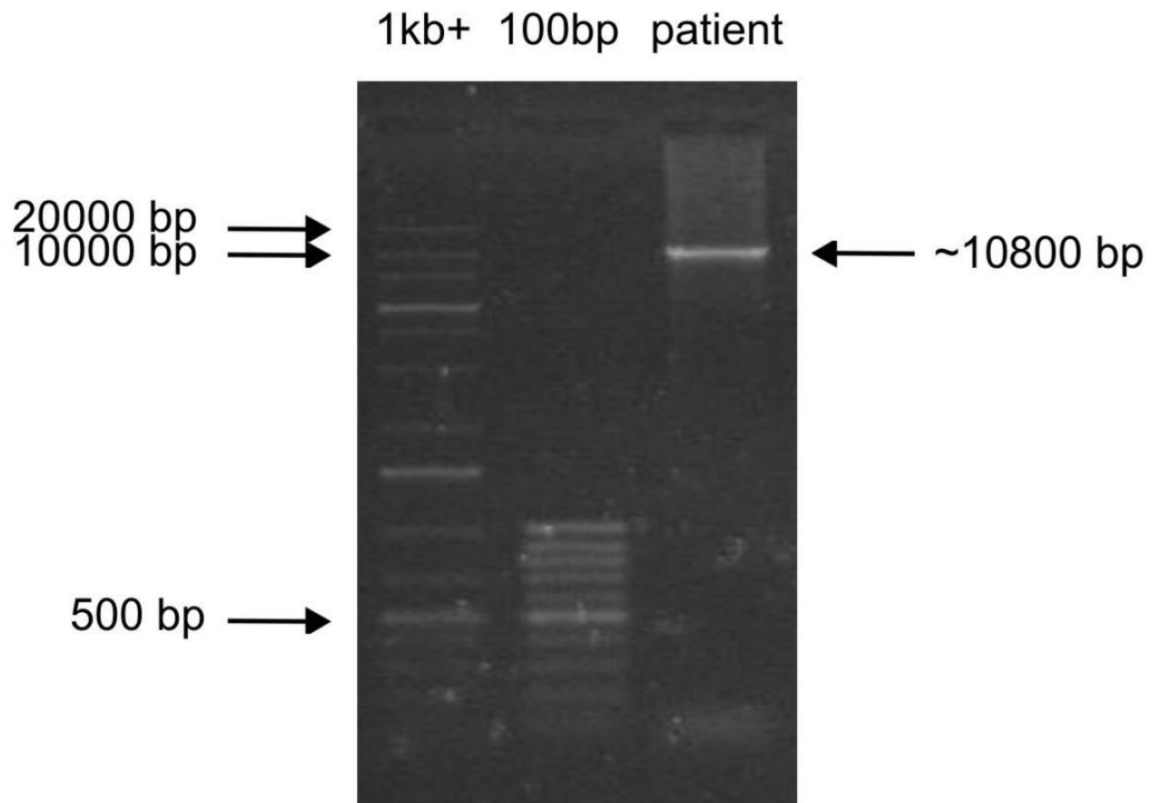

Supplement: Supplementary file 2 [file 1]
